# Supplementary material for: Risk Factors, Clinical Characteristics, Management, and Outcomes of Musculoskeletal Fungal Infection at Thailand’s Largest National Tertiary Referral Center
Source: MDPI journal article supplement (doi:10.3390/jof8020191), 2022-02-16
Supplement: s1 [file s1]

**Supplementary Table S1.** Summary of detailed clinical data of 28 patients with MSK fungal infection.

| Age (Year) | Sex    | Underlying Disease                                                                   | Pathogen                        | Site of Infection      | Type of Infection | Symptom Duration (Month) | Mechanism of Infection | Antifungal Treatment         | Duration of Antifungal Treatment (Month) | Surgery | Treatment Response |
|------------|--------|--------------------------------------------------------------------------------------|---------------------------------|------------------------|-------------------|--------------------------|------------------------|------------------------------|------------------------------------------|---------|--------------------|
| 22         | Male   | Overweight, alcohol drinking, smoking                                                | <i>T.marneffei</i>              | Scapular clavicle      | Osteomyelitis     | 2                        | Hematogenous           | Amphotericin B               | N/A                                      | Yes     | N/A                |
| 22         | Male   | Overweight, alcohol drinking, smoking                                                | <i>T.marneffei</i>              | Knee                   | Septic arthritis  | 2                        | Hematogenous           | Amphotericin B               | N/A                                      | Yes     | N/A                |
| 34         | Female | Cirrhosis CTP B, underweight, DM, ESRD on indwelling long term catheter, thalassemia | <i>C.parasilopsis</i>           | Hip<br>Knee            | Septic arthritis  | 9                        | Hematogenous           | Amphotericin B, fluconazole, | 0.5                                      | Yes     | PR                 |
| 44         | Male   | Overweight, alcohol drinking, smoking                                                | <i>Scadeosporium apiosperum</i> | Foot                   | Osteomyelitis     | 12                       | Direct inoculation     | Voriconazole                 | 9                                        | Yes     | CR                 |
| 45         | Female | CKD stage 2                                                                          | <i>C.neoforman</i>              | Tibia                  | Osteomyelitis     | 6                        | Hematogenous           | Fluconazole                  | 12                                       | Yes     | CR                 |
| 46         | Female | CKD stage 2                                                                          | <i>C.neoforman</i>              | Tibia                  | Osteomyelitis     | 6                        | Hematogenous           | fluconazole                  | 12                                       | Yes     | CR                 |
| 47         | Female | DM, CKD stage 2                                                                      | <i>T.marneffei</i>              | Disseminated infection |                   | 0.5                      | Hematogenous           | Amphotericin B, itraconazole | 21                                       | No      | PR                 |
| 51         | Male   | CKD stage 2, AOID with IGA                                                           | <i>T.marneffei</i>              | Knee                   | Septic arthritis  | 0.5                      | Hematogenous           | Itraconazole                 | 12                                       | Yes     | CR                 |
| 51         | Male   | CKD stage 2, AOID with IGA                                                           | <i>T.marneffei</i>              | Tibia                  | Osteomyelitis     | 0.5                      | Hematogenous           | Itraconazole                 | 12                                       | Yes     | CR                 |
| 53         | Female | CKD stage 4, AOID with IGA                                                           | <i>T.marneffei</i>              | Humerus                | Osteomyelitis     | 1                        | Hematogenous           | Amphotericin B, itraconazole | 13                                       | Yes     | PR                 |
| 53         | Female | CKD stage 4, Cirrhosis CTP C, AOID with IGA                                          | <i>T.marneffei</i>              | Shoulder               | Septic arthritis  | 1                        | Hematogenous           | Amphotericin B, itraconazole | 13                                       | Yes     | PR                 |
| 54         | Male   | DM, CKD stage 3a, overweight, alcohol drinking                                       | <i>Fusarium spp.</i>            | Foot                   | Osteomyelitis     | 3                        | Hematogenous           | Voriconazole                 | 12                                       | Yes     | CR                 |

|    |        |                                                     |                                   |          |                  |     |                    |                                            |      |     |     |
|----|--------|-----------------------------------------------------|-----------------------------------|----------|------------------|-----|--------------------|--------------------------------------------|------|-----|-----|
| 54 | Female | Overweight                                          | <i>Lomentospora prolificans</i>   | Vertebra | Osteomyelitis    | 12  | Hematogenous       | Amphotericin B                             | N/A  | No  | N/A |
| 58 | Female | AOID with IGA                                       | <i>C. neoforman</i>               | Hand     | Osteomyelitis    | 0.5 | Hematogenous       | Amphotericin B, fluconazole                | 13   | Yes | CR  |
| 59 | Male   | DM, CKD stage 4, overweight, smoking                | <i>Aspergillus fumigatus</i>      | Skull    | Osteomyelitis    | 2   | Direct inoculation | Amphotericin B, voriconazole               | 7    | Yes | PR  |
| 62 | Male   | CKD stage 4                                         | <i>Aspergillus spp.</i>           | Rib      | Osteomyelitis    | 7   | Hematogenous       | Voriconazole                               | 3    | Yes | CR  |
| 63 | Female | DM, overweight, asthma and allergic rhinitis        | <i>Rhizopus oryzae</i>            | Sinus    | Osteomyelitis    | 0.5 | Direct inoculation | Voriconazole                               | 2    | Yes | CR  |
| 63 | Female | DM, overweight, asthma and allergic rhinitis        | Unidentified hyaline septate mold | Sinus    | Osteomyelitis    | 1   | Direct inoculation | Amphotericin B, voriconazole, itraconazole | 13   | Yes | PR  |
| 67 | Male   | CKD stage 3a, overweight                            | <i>Paecilomyces spp.</i>          | Foot     | Osteomyelitis    | 120 | Hematogenous       | Itraconazole, voriconazole                 | 9    | No  | PR  |
| 70 | Male   | CKD stage 3b, overweight, alcohol drinking, smoking | <i>Candida parasilopsis</i>       | Knee     | Septic arthritis | 2   | Direct inoculation | Micafungin                                 | 7    | Yes | PR  |
| 70 | Male   | CKD stage 3b, overweight, alcohol drinking, smoking | <i>Candida parasilopsis</i>       | Tibia    | Osteomyelitis    | 2   | Direct inoculation | Micafungin                                 | 7    | Yes | PR  |
| 71 | Male   | DM, CKD stage 3b, smoking                           | <i>Fusarium spp.</i>              | Knee     | Septic arthritis | 2   | Hematogenous       | Voriconazole                               | 7    | Yes | CR  |
| 71 | Male   | DM, CKD stage 3b, smoking                           | <i>Fusarium spp.</i>              | Tibia    | Osteomyelitis    | 2   | Hematogenous       | Voriconazole                               | 7    | Yes | CR  |
| 72 | Male   | DM, CKD stage 3b, underweight, smoking              | <i>Fusarium spp.</i>              | Tibia    | Osteomyelitis    | 2   | Hematogenous       | Voriconazole                               | 7    | Yes | CR  |
| 74 | Female | CKD stage 3b, AOID with IGA                         | <i>T. marneffeii</i>              | Hand     | Osteomyelitis    | 2   | Hematogenous       | Amphotericin B, itraconazole               | 0.25 | Yes | CR  |
| 76 | Female | DM, CKD stage 4                                     | <i>Aspergillus flavus</i>         | Skull    | Osteomyelitis    | 3   | Direct inoculation | Amphotericin B, voriconazole               | 6.5  | Yes | CR  |
| 80 | Male   | CKD stage 3a                                        | <i>C. neoforman</i>               | Tibia    | Osteomyelitis    | 3   | Hematogenous       | Fluconazole                                | 16   | Yes | N/A |
| 81 | Male   | CKD stage 2, lymphoma                               | <i>C. neoforman</i>               | Tibia    | Osteomyelitis    | 3   | Hematogenous       | Itraconazole                               | 12   | Yes | N/A |

AOID with IGA, adult-onset immunodeficiency with anti-IFN- $\gamma$  autoantibodies; BMI, body mass index; CKD, chronic kidney disease; CR, complete response; CTP, Child-Turcotte-Pugh score; DM, diabetes mellitus; ESRD, end-stage renal disease; PR, partial response; N/A, not available.
